# Supplementary material for: Association between dementia parental family history and mid-life modifiable risk factors for dementia: a cross-sectional study using propensity score matching within the Lifelines cohort
Source: PubMed Central journal article supplement — BMJ Open. 2021 Dec 20;11(12):e049918. doi: 10.1136/bmjopen-2021-049918 (PMC8689157; doi:10.1136/bmjopen-2021-049918), 2021-12-20
Supplement: bmjopen-2021-049918supp001.pdf [file bmjopen-2021-049918supp001.pdf]

**SUPPLEMENTARY FILES**

**Supplementary file 1:** Models for the association between a PFH of dementia and the modifiable risk factors for dementia

**Supplementary file 2:** Flowchart of participant selection

**Supplementary file 3:** Standardized mean differences to identify imbalances between participants with and without a PFH of dementia without (with and without data imputation) and with PSM

**Supplementary file 4:** Sensitivity analyses with covariate adjustment to examine the association between having a PFH of dementia and modifiable risk factors for dementia

**Supplementary file 1.** Models for the association between parental family history of dementia and the modifiable risk factors for dementia

|                                                                                                            | <b>Without PSM</b>                  | <b>With PSM</b>                          |                                                                                                  |
|------------------------------------------------------------------------------------------------------------|-------------------------------------|------------------------------------------|--------------------------------------------------------------------------------------------------|
| <b>Outcome measures</b>                                                                                    | <b>Imputed data Determinant</b>     | <b>Model 1 Demographic confounders *</b> | <b>Model 2 Other potential confounders, including model 1*</b>                                   |
| Hypertension<br>High Cholesterol<br>Diabetes Mellitus<br>CVD<br>Obesity<br>Overweight<br>Renal dysfunction | Parental family history of dementia | Age<br>Sex<br>Education                  | Physical activity<br>Diet<br>Alcohol<br>Smoking<br>Stress<br>Depression                          |
| Physical activity<br>Diet<br>Alcohol<br>Smoking<br>Social activity                                         | Parental family history of dementia | Age<br>Sex<br>Education                  | Stress<br>Social activity<br>CVD<br>Diabetes<br>Cholesterol<br>Hypertension<br>Renal dysfunction |
| Depression<br>Stress                                                                                       | Parental family history of dementia | Age<br>Sex<br>Education                  | Physical activity<br>Diet<br>Stress<br>Social activity                                           |
| LIBRA score                                                                                                | Parental family history of dementia | Age<br>Sex<br>Education                  | not applicable                                                                                   |

\*Adjustment through matching on propensity score which is based on these potential confounders

Abbreviations: CVD Cardiovascular diseases, LIBRA Lifestyle for Brain Health

**Supplementary file 2.** Flowchart of participant selection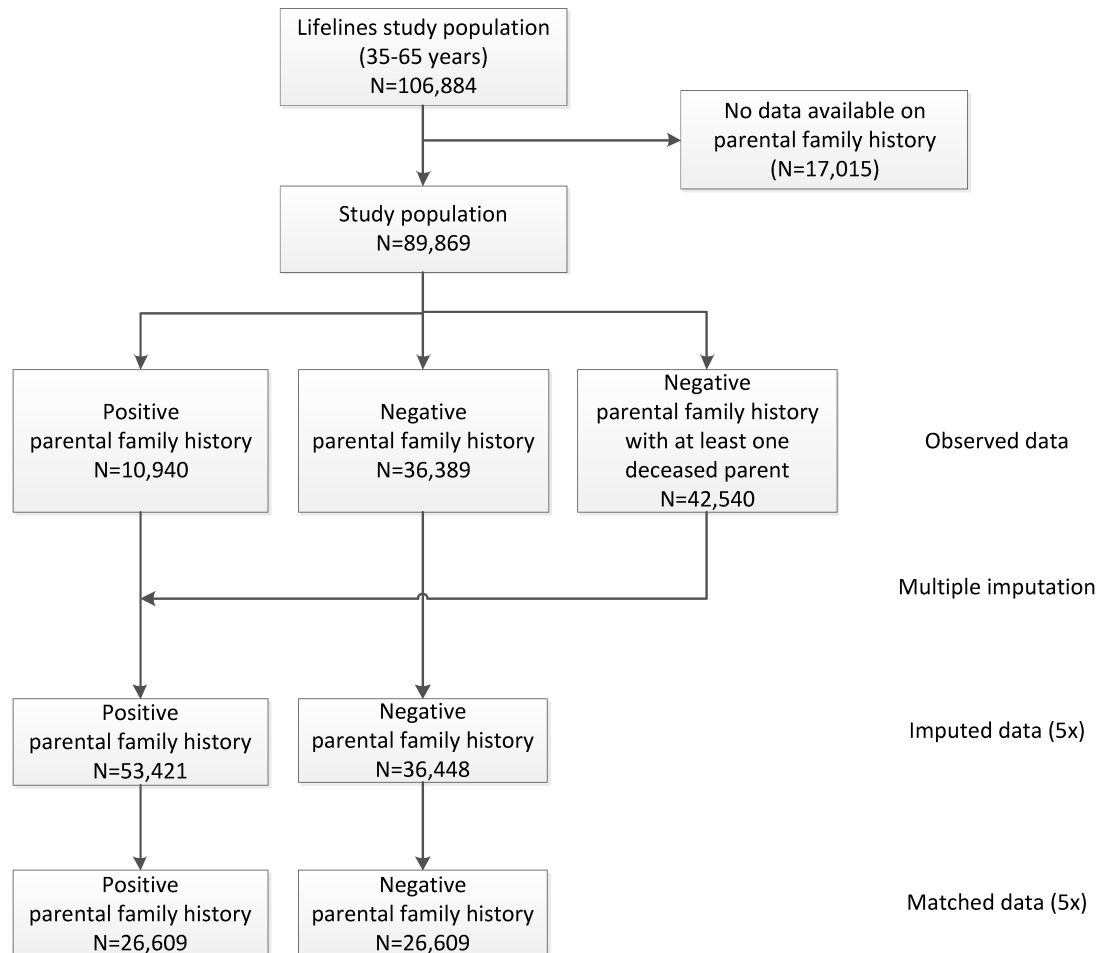

**Supplementary file 3.** Standardized mean differences to identify imbalances between participants with and without a parental family history of dementia without (with and without data imputation) and with PSM\*

|                                | Without PSM (SMD)           |                            | With PSM (SMD)                     |                                     |
|--------------------------------|-----------------------------|----------------------------|------------------------------------|-------------------------------------|
|                                | Observed data<br>(n=47,329) | Imputed data<br>(n=89,869) | Model 1 <sup>1</sup><br>(n=53,218) | Model 2 <sup>2#</sup><br>(n=53,644) |
| <b>Age</b>                     | <b>1.534</b>                | <b>1.209</b>               | 0.133                              | 0.170                               |
| <b>Sex, female</b>             | 0.023                       | 0.005                      | 0.091                              | 0.017                               |
| <b>Education</b>               |                             |                            |                                    |                                     |
| Elementary                     | 0.106                       | 0.123                      | 0.048                              | 0.062                               |
| Lower secondary                | <b>0.234</b>                | <b>0.274</b>               | 0.035                              | 0.020                               |
| Upper secondary                | 0.170                       | 0.141                      | -0.172                             | -0.035                              |
| Tertiary                       | 0.078                       | 0.154                      | 0.133                              | -0.005                              |
| <b>Hypertension</b>            | <b>0.304</b>                | <b>0.286</b>               | 0.066                              | 0.041                               |
| <b>High cholesterol</b>        | <b>0.265</b>                | <b>0.248</b>               | <b>0.231</b>                       | 0.038                               |
| <b>Diabetes</b>                | 0.121                       | 0.125                      | -0.025                             | 0.018                               |
| <b>Cardiovascular diseases</b> | 0.119                       | 0.122                      | <b>0.261</b>                       | 0.007                               |
| <b>Obesity</b>                 | 0.037                       | 0.070                      | 0.052                              | 0.055                               |
| <b>Overweight</b>              | 0.113                       | 0.134                      | 0.102                              | 0.103                               |
| <b>Renal dysfunction</b>       |                             |                            |                                    |                                     |
| No dysfunction                 | <b>0.325</b>                | <b>0.278</b>               | <b>-0.206</b>                      | <b>-0.207</b>                       |
| Moderate                       | <b>0.311</b>                | <b>0.264</b>               | 0.193                              | 0.027                               |
| High                           | 0.081                       | 0.087                      | 0.078                              | 0.004                               |
| <b>Physical inactivity</b>     | <b>0.375</b>                | <b>0.300</b>               | <b>0.278</b>                       | 0.012                               |
| <b>Diet score</b>              | <b>0.278</b>                | 0.194                      | 0.160                              | 0.051                               |
| <b>Alcohol consumption</b>     |                             |                            |                                    |                                     |
| No drinking                    | 0.066                       | <0.001                     | -0.024                             | -0.039                              |
| Moderate                       | 0.001                       | 0.010                      | -0.036                             | -0.039                              |
| Excessive                      | 0.112                       | 0.072                      | 0.059                              | -0.001                              |
| <b>Smoking</b>                 |                             |                            |                                    |                                     |
| Never smoker                   | 0.105                       | <b>0.228</b>               | -0.193                             | -0.167                              |
| Ex-smoker                      | 0.066                       | <b>0.259</b>               | <b>0.218</b>                       | 0.039                               |
| Current smoker                 | 0.059                       | 0.024                      | -0.021                             | 0.008                               |
| <b>Social activity</b>         |                             |                            |                                    |                                     |
| Low (<4)                       | 0.011                       | 0.044                      | 0.026                              | 0.021                               |
| Moderate (4-7)                 | 0.016                       | 0.023                      | 0.018                              | -0.036                              |
| High (≥8)                      | 0.015                       | 0.046                      | -0.031                             | -0.032                              |
| <b>Depression</b>              | 0.045                       | 0.023                      | 0.018                              | 0.024                               |
| <b>Stress</b>                  | 0.027                       | 0.183                      | -0.162                             | 0.028                               |

\* SMDs higher than 0.2 are shown in bold

# The highest SMDs are shown for model 2

1 : matched on age, sex and education level

2: additionally matched on physical inactivity, diet, alcohol consumption, smoking, stress, depression, social activity, cardiovascular diseases, diabetes, high cholesterol, hypertension and renal dysfunction, depending on outcome measure (see **Supplementary file 1**)

**Supplementary file 4.** Sensitivity analyses with covariate adjustment to examine the association between having a PFH of dementia and modifiable risk factors for dementia

|                                                   | OR (95%-CI)                 |                               |                               |
|---------------------------------------------------|-----------------------------|-------------------------------|-------------------------------|
|                                                   | Imputed data (n=89,869)     |                               |                               |
|                                                   | Crude model                 | Adjusted model 1 <sup>1</sup> | Adjusted model 2 <sup>2</sup> |
| <b>Hypertension</b>                               | <b>1.82 (1.77, 1.88)</b>    | <b>1.12 (1.09, 1.16)</b>      | <b>1.12 (1.08, 1.16)</b>      |
| <b>High cholesterol</b>                           | <b>1.80 (1.74, 1.86)</b>    | <b>1.20 (1.55, 1.24)</b>      | <b>1.17 (1.13, 1.22)</b>      |
| <b>Diabetes Mellitus</b>                          | <b>2.07 (1.91, 2.26)</b>    | <b>1.12 (1.02, 1.24)</b>      | 1.09 (0.99, 1.21)             |
| <b>CVD</b>                                        | <b>2.93 (2.58, 3.33)</b>    | <b>1.34 (1.16, 1.56)</b>      | <b>1.29 (1.12, 1.50)</b>      |
| <b>Obesity</b>                                    | <b>1.21 (1.17, 1.26)</b>    | <b>1.13 (1.08, 1.18)</b>      | <b>1.12 (1.07, 1.17)</b>      |
| <b>Overweight</b>                                 | <b>1.31 (1.28, 1.35)</b>    | <b>1.09 (1.06, 1.13)</b>      | <b>1.08 (1.05, 1.12)</b>      |
| <b>Renal dysfunction</b><br>(ref: no dysfunction) |                             |                               |                               |
| Moderate                                          | <b>1.79 (1.74, 1.84)</b>    | <b>0.92 (0.89, 0.95)</b>      | <b>0.93 (0.89, 0.96)</b>      |
| High                                              | <b>4.10 (3.30, 5.09)</b>    | 0.95 (0.74, 1.20)             | 0.96 (0.75, 1.24)             |
| <b>Physical inactivity</b>                        | <b>0.55 (0.53, 0.56)</b>    | 1.02 (0.99, 1.06)             | 0.99 (0.95, 1.02)             |
| <b>Diet (RC; 95%-CI)</b>                          | <b>1.13 (1.05, 1.22)</b>    | -0.04 (-0.12, 0.05)           | -0.02 (-0.11, 0.07)           |
| <b>Alcohol</b> (ref: no consumption)              |                             |                               |                               |
| Low/Moderate                                      | 1.02 (0.99, 1.06)           | 0.90 (0.86, 0.94)             | <b>0.91 (0.88, 0.95)</b>      |
| Excessive                                         | <b>1.18 (1.14, 1.23)</b>    | 0.98 (0.93, 1.03)             | 0.99 (0.94, 1.04)             |
| <b>Smoking</b> (ref: never smoker)                |                             |                               |                               |
| Ex-smoker                                         | <b>1.83 (1.77, 1.89)</b>    | <b>1.16 (1.12, 1.20)</b>      | <b>1.15 (1.11, 1.19)</b>      |
| Current smoker                                    | <b>1.22 (1.18, 1.27)</b>    | <b>1.21 (1.16, 1.26)</b>      | <b>1.18 (1.14, 1.24)</b>      |
| <b>Social activity</b> (ref: high activity)       |                             |                               |                               |
| Moderate                                          | <b>0.89 (0.84, 0.95)</b>    | 0.98 (0.91, 1.05)             | 0.98 (0.91, 1.05)             |
| Low                                               | <b>0.83 (0.78, 0.87)</b>    | 0.88 (0.82, 0.94)             | <b>0.88 (0.83, 0.94)</b>      |
| <b>Depression</b>                                 | <b>1.18 (1.07, 1.30)</b>    | <b>1.25 (1.12, 1.40)</b>      | <b>1.23 (1.10, 1.38)</b>      |
| <b>Stress (RC; 95%-CI)</b>                        | <b>-0.42 (-0.45, -0.39)</b> | <b>0.09 (0.05, 0.12)</b>      | <b>0.08 (0.04, 0.11)</b>      |

\* Odds ratios with 95% confidence intervals are reported, unless stated otherwise; significant associations are shown in bold

1: adjusted for age, sex and education level

2: additionally adjusted for on physical inactivity, diet, alcohol consumption, smoking, stress, depression, social activity, cardiovascular diseases, diabetes, high cholesterol, hypertension and renal dysfunction, depending on outcome measure (see **Supplementary file 1**)
